# Supplementary material for: APOBEC3-Mediated RNA Editing in Breast Cancer is Associated with Heightened Immune Activity and Improved Survival
Source: MDPI journal article supplement (doi:10.3390/ijms20225621), 2019-11-10
Supplement: s1 [file s1]

## SUPPLEMENTAL MATERIALS

Asaoka et al. *APOBEC3-mediated RNA editing in breast cancer tumors is associated with heightened immune activity and improved survival.*

### Content

1. Figure S1. Estimation of RNA editing levels using RNA and DNA sequencing data.
2. Figure S2. Example views of mapped sequencing read alignment data illustrating C-to-U RNA editing events.
3. Figure S3. Correlation of RNA editing levels determined with originally aligned and re-aligned RNA sequencing data.
4. Figure S4. *APOBEC3* gene expression differences between tumors with editing absent and present for four editing sites.
5. Table S1. Genome positions that were examined for RNA editing.
6. Table S2. Characteristics of determinations made for estimation of RNA editing levels.
7. Table S3. Fifty most commonly edited sites among tumors.
8. Table S4. Genes with significant differential expression between editing-high and -low tumors.

**Figure S1.** *Estimation of RNA editing levels using RNA and DNA sequencing data.* The flow diagram shows the scheme to estimate C-to-U RNA editing level at a given genome position using aligned RNA and DNA sequencing (*seq.*) data. In this diagram, the genome position is in a gene that is transcribed from the + or upper chromosome strand. G and A are respectively the reference and variant bases in case of genes transcribed from the other strand.

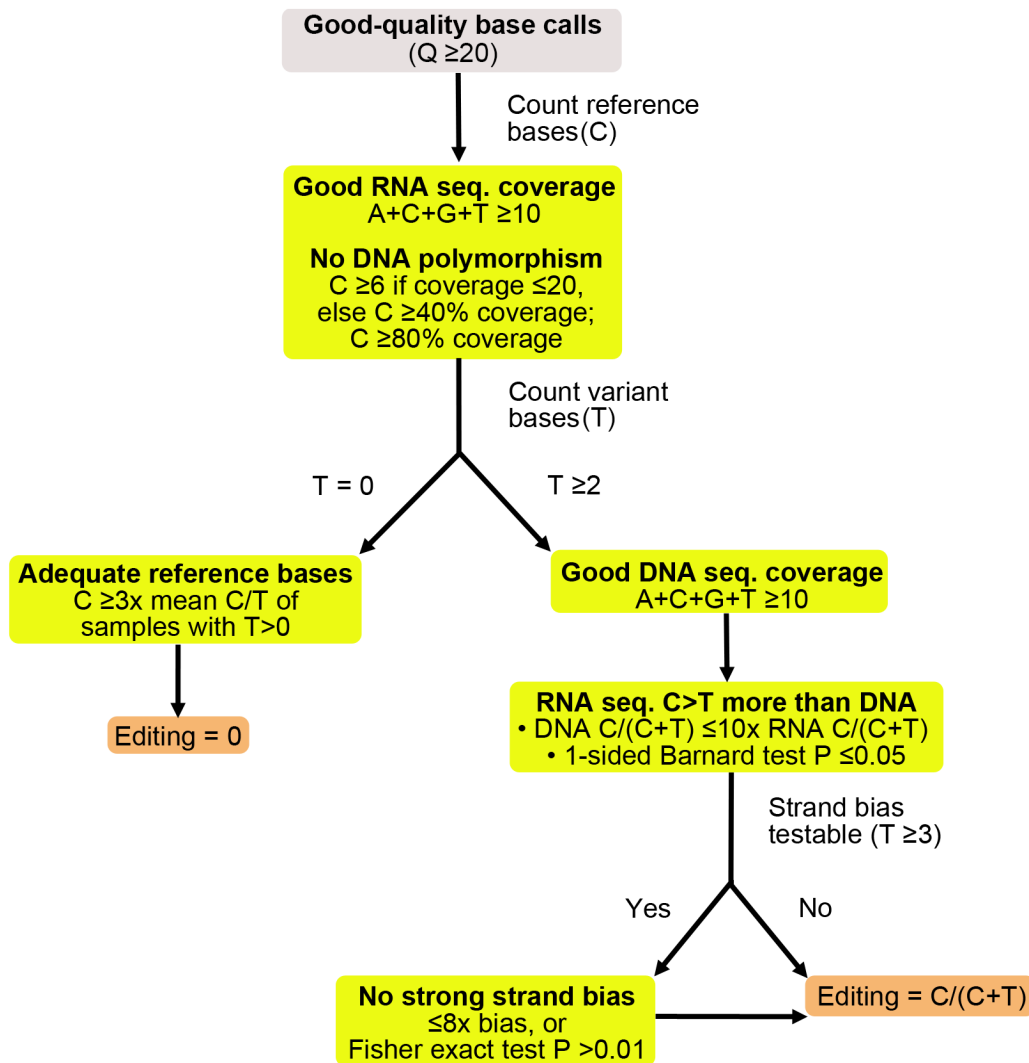

**Figure S2.** Example views of mapped sequencing read alignment data illustrating C-to-U RNA editing events. Screenshots of views in Integrative Genomics Viewer application (version 2.6.3) are shown for two tumor samples each for two C-to-U RNA editing sites (arrows) that are in *CYP27A1* and *SERPINA1* genes. These genes are respectively transcribed from the + (upper) and – (lower) chromosome strands. The + strand DNA and translated protein sequences are shown at bottom. Also shown are TCGA patient identifiers, GRCh38 reference-based genome positions, and base calls from aligned RNA or DNA sequencing (*seq.*) reads at the positions. Sequencing reads are in grey with any base mismatch with + strand DNA colored (green: A, red: C). Not all reads are visible in the application window. Read alignments are unfiltered.

Chr. 14:94378482  
*SERPINA1*

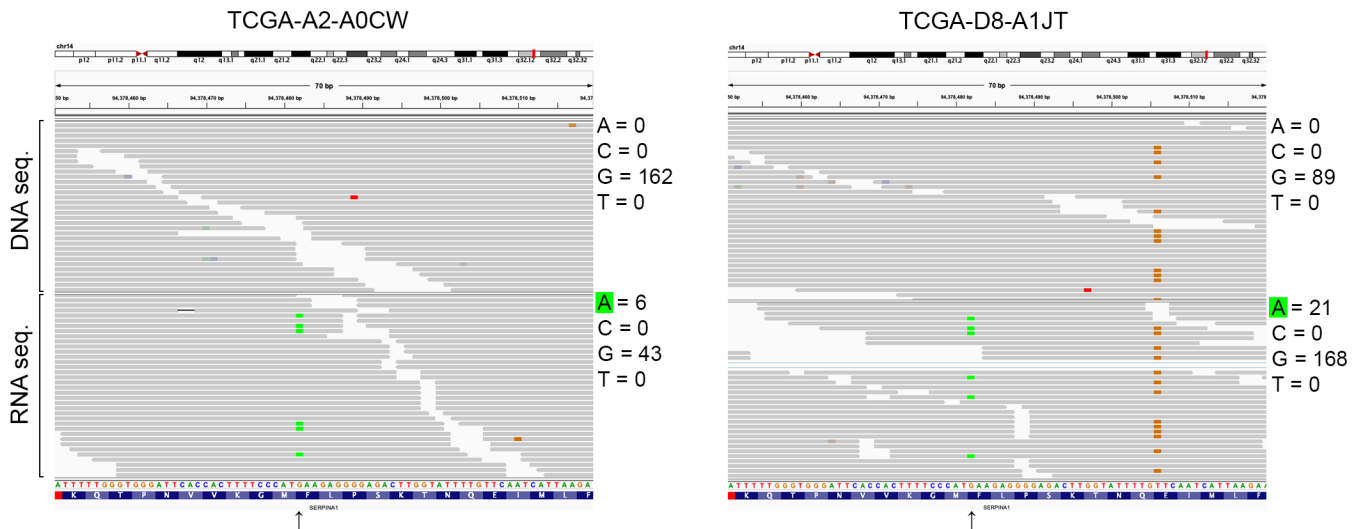

Chr. 2:218812625  
*CYP27A1*

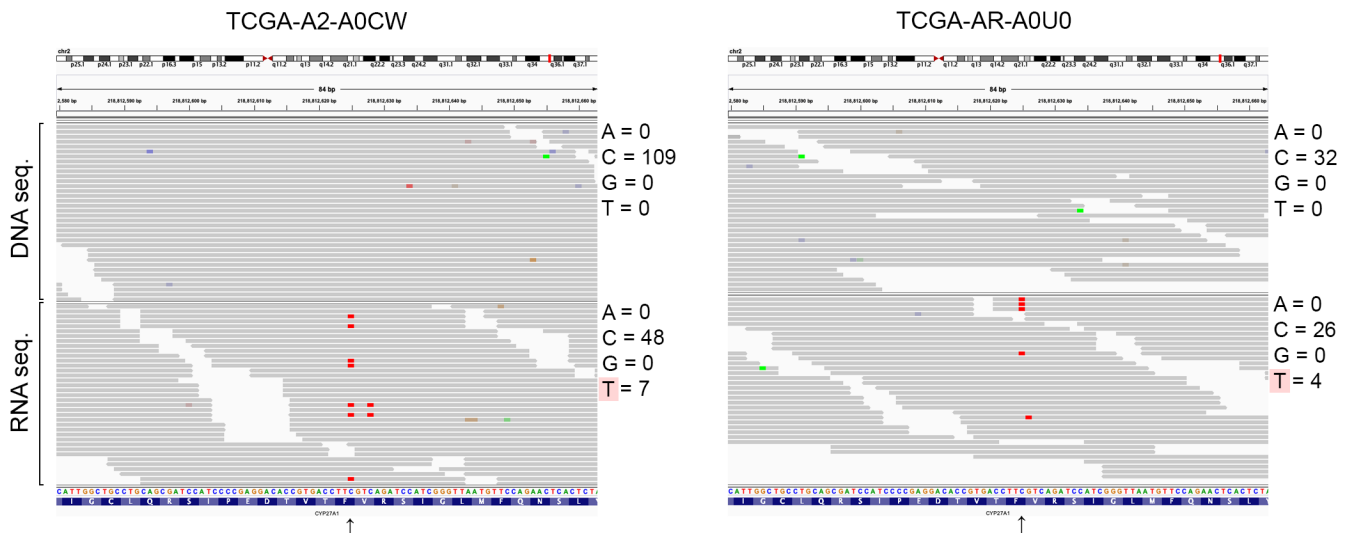

**Figure S3.** *Correlation of RNA editing levels determined with originally aligned and re-aligned RNA sequencing data.* For 24 C-to-U RNA editing events that were identified in four tumor samples, the RNA editing levels were re-determined after re-aligning RNA sequencing data. For re-alignment, fastq read data was extracted from the aligned data (BAM files) that had been generated by Genomic Data Commons (GDC), and then extracted paired read (but not singletons) were re-aligned using Subread subunc aligner software against version 81 of the Ensembl GRCh38 reference genome. C-to-U RNA editing levels were calculated as the ratio of variant to sum of variant and reference base calls of phred33 quality  $\geq 20$ . Editing levels with the GDC- and re-aligned data are plotted.

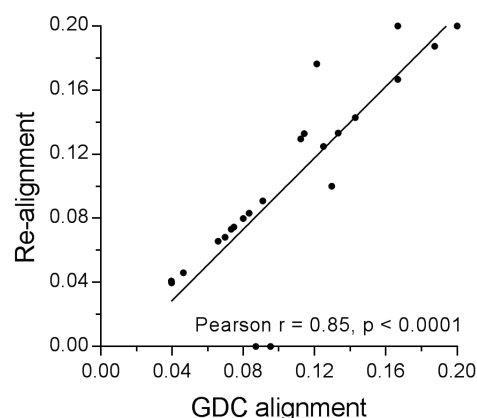

**Figure S4.** *APOBEC3* gene expression differences between tumors with editing absent and present for four editing sites. Tukey boxplots show expression of *APOBEC3A*, *APOBEC3G*, and *APOBEC3H* genes in tumors with and without C-to-U RNA editing at four known *APOBEC3*-mediated RNA editing sites. GRCh38 genome coordinates of the sites and the genes they are in are noted. Shown p values were calculated with standard t test. *TPM*, transcripts per million.

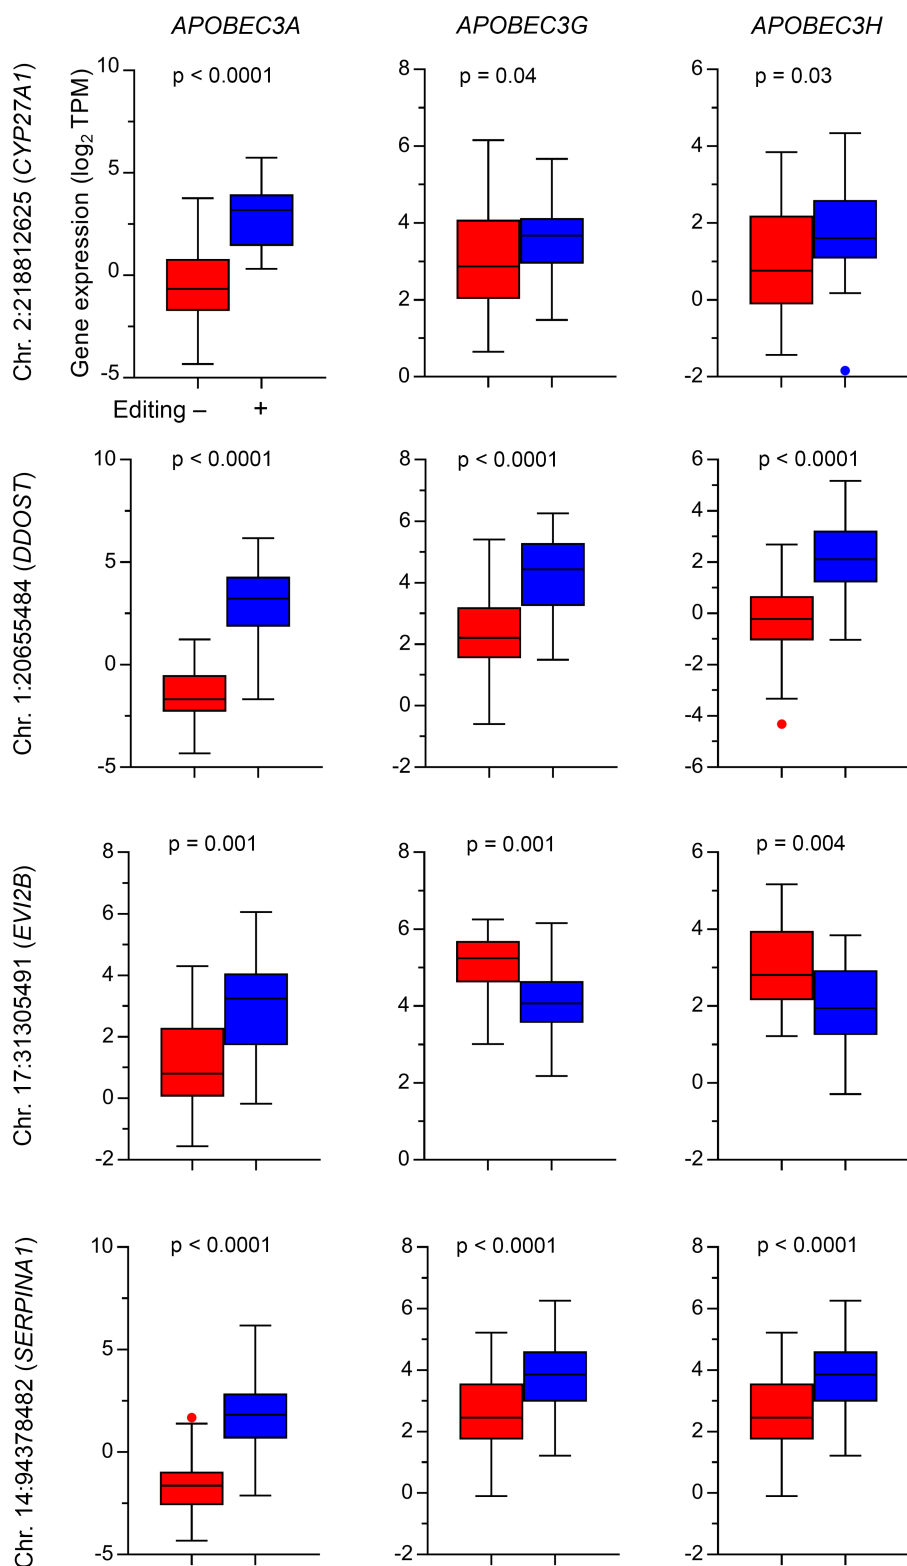

**Table S1.** Genome positions that were examined for RNA editing<sup>a</sup>.

*Microsoft Excel file 'Table S1.xls'*

<sup>a</sup>Genome coordinates (GRCh38 reference) of the 5,208 C-to-U RNA editing and 198 negative control sites that were examined in the study. Positions for the editing sites are annotated with information such as gene and effect of editing on protein sequence.

**Table S2.** Characteristics of determinations made for estimation of RNA editing levels<sup>a</sup>.

| <i>Criterion/feature</i>                                     | <i>Editing</i> | <i>n</i> | <i>%</i> |
|--------------------------------------------------------------|----------------|----------|----------|
| Poor RNA seq. coverage (< 10):                               | ND             | 700,501  | 11.872   |
| Coverage = 0                                                 | ND             | 154,404  | 2.617    |
| Coverage = 1-9                                               | ND             | 546,097  | 9.255    |
| Likely gene polymorphism <sup>b</sup> :                      | ND             | 4,407    | 0.075    |
| Heterozygous                                                 | ND             | 3,068    | 0.052    |
| Homozygous                                                   | ND             | 1,339    | 0.023    |
| 0 variant base in RNA seq. data:                             | ND / 0         | 4854,111 | 82.264   |
| Inadequate <sup>b</sup> reference bases                      | ND             | 4825,142 | 81.773   |
| Adequate reference bases                                     | 0              | 28,969   | 0.491    |
| 1 variant base in RNA seq. data                              | ND             | 249,075  | 4.221    |
| > 1 variant base in RNA seq. data:                           | ND / > 0       | 92,570   | 1.569    |
| Poor DNA seq. coverage (< 10):                               | ND             | 25,866   | 0.438    |
| Coverage = 0                                                 | ND             | 8,222    | 0.139    |
| Coverage = 1-9                                               | ND             | 17,644   | 0.299    |
| Good DNA seq. coverage ( $\geq 10$ ):                        | ND / > 0       | 66,704   | 1.13     |
| $P^c > 0.05$ in RNA seq. vs. DNA seq. variation comparison   | ND             | 65,015   | 1.102    |
| $P \leq 0.05$ in RNA seq. vs. DNA seq. variation comparison: | > 0            | 1,689    | 0.029    |
| 0 variant base in DNA seq. data:                             | ND / > 0       | 1,638    | 0.028    |
| Fail strand-bias test <sup>b</sup>                           | ND             | 46       | 0.001    |
| $\geq 1$ variant base in DNA seq. data:                      | ND / > 0       | 51       | 0.001    |
| RNA seq. variation level <sup>d</sup> < $10 \times$ DNA seq. | ND             | 17       | < 0.001  |
| RNA seq. variation level $\geq 10 \times$ DNA seq.:          | ND / > 0       | 34       | 0.001    |
| Fail strand-bias test                                        | ND             | 1        | < 0.001  |

<sup>a</sup>Determinations were made for 1,133 samples to estimate C-to-U RNA editing levels for 5,208 sites by examination of RNA and DNA sequencing (*seq.*) data using a set of criteria that were applied sequentially, as indicated in this table. The number (*n*) of determinations fulfilling the criteria and their features are listed. Percentages are with respect to the total number of determinations ( $1,133 \times 5,208$ ). Assigned editing level for the criteria and features are also shown (*ND*, not determinable).

<sup>b</sup>Refer to main text for explanation.

<sup>c</sup>In one-sided Barnard test with contingency table of reference and variant base counts in RNA and DNA seq. data.

<sup>d</sup>Variation level is the ratio of variant base count to sum of variant and reference base counts.

**Table S3.** Fifty most commonly edited sites among tumors.

| Genome position | Gene            | Tumors               |                 |                 | Mean editing level <sup>b</sup> (%) | RNA region <sup>c</sup> | Editing effect |
|-----------------|-----------------|----------------------|-----------------|-----------------|-------------------------------------|-------------------------|----------------|
|                 |                 | Editing determinable | Editing present | Edited fraction |                                     |                         |                |
| 1:153818890     | <i>GATAD2B</i>  | 7                    | 7               | 1.00            | 4.62                                | Exonic                  | Synonymous     |
| 14:94378482     | <i>SERPINA1</i> | 198                  | 160             | 0.81            | 7.67                                | Exonic                  | Synonymous     |
| 11:10461666     | <i>AMPD3</i>    | 15                   | 12              | 0.80            | 12.50                               | Exonic                  | Synonymous     |
| 17:31305491     | <i>EVI2B</i>    | 57                   | 43              | 0.75            | 4.59                                | Exonic                  | Non-synonymous |
| 10:98418201     | <i>HPS1</i>     | 8                    | 5               | 0.63            | 8.68                                | Exonic                  | Synonymous     |
| 12:121162497    | <i>P2RX7</i>    | 8                    | 5               | 0.63            | 14.67                               | Exonic                  | Synonymous     |
| 15:22873718     | <i>CYFIP1</i>   | 8                    | 5               | 0.63            | 8.27                                | Exonic                  | Synonymous     |
| 16:31381814     | <i>ITGAX</i>    | 16                   | 10              | 0.63            | 7.39                                | Exonic                  | Synonymous     |
| 16:12052031     | <i>SNX29</i>    | 13                   | 8               | 0.62            | 11.68                               | Exonic                  | Synonymous     |
| 4:109684468     | <i>CCDC109B</i> | 18                   | 11              | 0.61            | 3.65                                | Exonic                  | Non-synonymous |
| 3:152432796     | <i>MBNL1</i>    | 5                    | 3               | 0.60            | 5.80                                | Exonic                  | Non-synonymous |
| 3:196728061     | <i>PIGX</i>     | 17                   | 10              | 0.59            | 5.07                                | Exonic                  | Non-synonymous |
| 1:155612311     | <i>MSTO1</i>    | 12                   | 7               | 0.58            | 6.17                                | Exonic                  | Non-synonymous |
| 1:161543002     | <i>FCGR3A</i>   | 24                   | 14              | 0.58            | 2.98                                | 3'UTR                   |                |
| 16:2061900      | <i>TSC2</i>     | 7                    | 4               | 0.57            | 8.60                                | Exonic                  | Synonymous     |
| 2:218584705     | <i>RQCD1</i>    | 9                    | 5               | 0.56            | 3.72                                | Exonic                  | Synonymous     |
| 3:30672308      | <i>TGFBR2</i>   | 9                    | 5               | 0.56            | 4.05                                | Exonic                  | Synonymous     |
| 1:20655484      | <i>DDOST</i>    | 109                  | 60              | 0.55            | 4.42                                | Exonic                  | Synonymous     |
| 2:97792880      | <i>TMEM131</i>  | 11                   | 6               | 0.55            | 4.64                                | Exonic                  | Non-synonymous |
| 5:116052036     | <i>ARL14EPL</i> | 61                   | 33              | 0.54            | 3.18                                | Intronic                |                |
| 1:117096230     | <i>TTF2</i>     | 36                   | 19              | 0.53            | 9.74                                | Exonic                  | Synonymous     |
| 1:30873312      | <i>SDC3</i>     | 8                    | 4               | 0.50            | 6.69                                | Exonic                  | Non-synonymous |
| 10:100236856    | <i>CWF19L1</i>  | 6                    | 3               | 0.50            | 3.22                                | Exonic                  | Synonymous     |
| 10:109907707    | <i>XPNPEP1</i>  | 6                    | 3               | 0.50            | 7.22                                | Exonic                  | Non-synonymous |
| 11:3691446      | <i>NUP98</i>    | 6                    | 3               | 0.50            | 3.07                                | Exonic                  | Non-synonymous |
| 15:59188146     | <i>MYO1E</i>    | 6                    | 3               | 0.50            | 4.23                                | Exonic                  | Non-synonymous |
| 13:41470511     | <i>RGCC</i>     | 62                   | 30              | 0.48            | 3.95                                | 3'UTR                   |                |
| 16:47155742     | <i>ITFG1</i>    | 23                   | 11              | 0.48            | 2.48                                | Exonic                  | Non-synonymous |
| 8:123226597     | <i>C8orf76</i>  | 13                   | 6               | 0.46            | 2.47                                | Exonic                  | Non-synonymous |
| 22:29508462     | <i>THOC5</i>    | 35                   | 16              | 0.46            | 7.35                                | Exonic                  | Non-synonymous |
| 9:379811        | <i>DOCK8</i>    | 16                   | 7               | 0.44            | 12.67                               | Exonic                  | Synonymous     |
| 10:5927502      | <i>FBXO18</i>   | 7                    | 3               | 0.43            | 2.37                                | Exonic                  | Synonymous     |
| 3:53882012      | <i>ACTR8</i>    | 7                    | 3               | 0.43            | 12.67                               | Exonic                  | Synonymous     |
| 7:44969774      | <i>MYO1G</i>    | 7                    | 3               | 0.43            | 8.93                                | Exonic                  | Synonymous     |
| 15:55360453     | <i>CCPG1</i>    | 12                   | 5               | 0.42            | 2.65                                | Exonic                  | Synonymous     |
| 8:89943303      | <i>NBN</i>      | 36                   | 15              | 0.42            | 2.10                                | Exonic                  | Non-synonymous |
| 2:218812625     | <i>CYP27A1</i>  | 61                   | 25              | 0.41            | 6.14                                | Exonic                  | Synonymous     |
| 1:1756558       | <i>NADK</i>     | 5                    | 2               | 0.40            | 3.00                                | Exonic                  | Synonymous     |
| 1:222664054     | <i>MIA3</i>     | 5                    | 2               | 0.40            | 2.27                                | Exonic                  | Synonymous     |
| 11:65183499     | <i>CAPN1</i>    | 5                    | 2               | 0.40            | 8.10                                | Exonic                  | Synonymous     |
| 12:123727864    | <i>ATP6V0A2</i> | 5                    | 2               | 0.40            | 11.27                               | Exonic                  | Synonymous     |
| 15:73283052     | <i>NEO1</i>     | 5                    | 2               | 0.40            | 8.25                                | Exonic                  | Synonymous     |
| 19:40447937     | <i>BLVRB</i>    | 35                   | 14              | 0.40            | 1.96                                | Exonic                  | Synonymous     |



|             |                |    |   |      |      |        |                |
|-------------|----------------|----|---|------|------|--------|----------------|
| 2:44322759  | <i>PREPL</i>   | 5  | 2 | 0.40 | 1.99 | Exonic | Synonymous     |
| 20:47310132 | <i>ZMYND8</i>  | 5  | 2 | 0.40 | 3.55 | Exonic | Non-synonymous |
| 3:23977363  | <i>NR1D2</i>   | 5  | 2 | 0.40 | 7.96 | Exonic | Stop gain      |
| 4:13599665  | <i>BOD1L1</i>  | 5  | 2 | 0.40 | 3.30 | Exonic | Non-synonymous |
| 5:146271606 | <i>RBM27</i>   | 5  | 2 | 0.40 | 8.01 | Exonic | Non-synonymous |
| 6:70857991  | <i>SMAP1</i>   | 5  | 2 | 0.40 | 7.31 | Exonic | Non-synonymous |
| 3:52843751  | <i>TMEM110</i> | 13 | 5 | 0.38 | 4.68 | Exonic | Synonymous     |

<sup>a</sup>Genome coordinates (chromosome:position, GRCh38 reference) of positions for which C-to-U RNA editing was most frequent. Positions with editing level determinable for < 5 tumors are excluded.

<sup>b</sup>Among tumors with editing present.

<sup>c</sup>Annotations for RNA region and effect of editing on protein-coding are generated with ANNOVAR. *UTR*, untranslated region.

**Table S4.** Genes with significant differential expression between editing-high and -low tumors<sup>a</sup>.

| <i>Gene<sup>b</sup></i> | <i>Name</i>                                                                          | <i>Log<sub>2</sub><br/>FC</i> | <i>P</i> | <i>Adjusted<br/>P</i> |
|-------------------------|--------------------------------------------------------------------------------------|-------------------------------|----------|-----------------------|
| <i>APOBEC3A</i>         | apolipoprotein B mRNA editing enzyme catalytic subunit 3A                            | 1.56                          | 7.71E-26 | 1.68E-21              |
| <i>IDO1</i>             | indoleamine 2,3-dioxygenase 1                                                        | 1.46                          | 1.02E-20 | 1.31E-17              |
| <i>CXCL11</i>           | C-X-C motif chemokine ligand 11                                                      | 1.43                          | 2.54E-23 | 7.93E-20              |
| <i>KIR2DL4</i>          | killer cell immunoglobulin like receptor, two Ig domains and long cytoplasmic tail 4 | 1.43                          | 3.14E-18 | 2.28E-15              |
| <i>CXCL10</i>           | C-X-C motif chemokine ligand 10                                                      | 1.38                          | 1.98E-24 | 1.44E-20              |
| <i>CASP14</i>           | caspase 14                                                                           | 1.37                          | 2.21E-05 | 2.55E-04              |
| <i>COL6A5</i>           | collagen type VI alpha 5 chain                                                       | 1.37                          | 2.50E-15 | 6.57E-13              |
| <i>S100A7</i>           | S100 calcium binding protein A7                                                      | 1.36                          | 8.48E-05 | 7.55E-04              |
| <i>IFNL1</i>            | interferon lambda 1                                                                  | 1.32                          | 1.88E-15 | 5.25E-13              |
| <i>CXCL9</i>            | C-X-C motif chemokine ligand 9                                                       | 1.30                          | 1.34E-15 | 4.10E-13              |
| <i>ZBED2</i>            | zinc finger BED-type containing 2                                                    | 1.28                          | 1.91E-15 | 5.28E-13              |
| <i>S100A8</i>           | S100 calcium binding protein A8                                                      | 1.28                          | 5.69E-10 | 3.77E-08              |
| <i>IFNL2</i>            | interferon lambda 2                                                                  | 1.27                          | 2.67E-15 | 6.93E-13              |
| <i>GZMB</i>             | granzyme B                                                                           | 1.26                          | 9.44E-18 | 5.72E-15              |
| <i>AQP9</i>             | aquaporin 9                                                                          | 1.26                          | 2.02E-14 | 4.20E-12              |
| <i>CXCL13</i>           | C-X-C motif chemokine ligand 13                                                      | 1.24                          | 1.93E-09 | 1.09E-07              |
| <i>LAMP3</i>            | lysosomal associated membrane protein 3                                              | 1.23                          | 1.90E-20 | 2.18E-17              |
| <i>IFNG</i>             | interferon gamma                                                                     | 1.23                          | 1.60E-12 | 2.19E-10              |
| <i>LINC02446</i>        | long intergenic non-protein coding RNA 2446                                          | 1.23                          | 7.96E-13 | 1.17E-10              |
| <i>ICOS</i>             | inducible T cell costimulator                                                        | 1.20                          | 5.49E-17 | 2.44E-14              |
| <i>CLEC6A</i>           | C-type lectin domain containing 6A                                                   | 1.20                          | 7.24E-13 | 1.07E-10              |
| <i>GBP1P1</i>           | guanylate binding protein 1 pseudogene 1                                             | 1.19                          | 7.29E-22 | 1.32E-18              |
| <i>GBP5</i>             | guanylate binding protein 5                                                          | 1.19                          | 3.59E-19 | 3.27E-16              |
| <i>S100A7A</i>          | S100 calcium binding protein A7A                                                     | 1.18                          | 4.71E-05 | 4.68E-04              |
| <i>ACOD1</i>            | aconitate decarboxylase 1                                                            | 1.17                          | 2.89E-14 | 5.63E-12              |
| <i>ADAMDEC1</i>         | ADAM like decysin 1                                                                  | 1.17                          | 1.29E-14 | 2.81E-12              |
| <i>MARCO</i>            | macrophage receptor with collagenous structure                                       | 1.16                          | 1.28E-09 | 7.55E-08              |
| <i>PRAME</i>            | preferentially expressed antigen in melanoma                                         | 1.16                          | 3.24E-04 | 2.22E-03              |
| <i>IGHV2-70</i>         | immunoglobulin heavy variable 2-70                                                   | 1.15                          | 4.45E-07 | 1.01E-05              |
| <i>IFNB1</i>            | interferon beta 1                                                                    | 1.14                          | 1.68E-15 | 4.82E-13              |
| <i>A2ML1</i>            | alpha-2-macroglobulin like 1                                                         | 1.13                          | 2.37E-07 | 6.01E-06              |
| <i>KLHDC7B</i>          | kelch domain containing 7B                                                           | 1.11                          | 1.03E-13 | 1.78E-11              |
| <i>CCR8</i>             | C-C motif chemokine receptor 8                                                       | 1.10                          | 4.01E-12 | 4.95E-10              |
| <i>FPR2</i>             | formyl peptide receptor 2                                                            | 1.10                          | 5.11E-15 | 1.22E-12              |
| <i>TNIP3</i>            | TNFAIP3 interacting protein 3                                                        | 1.10                          | 3.62E-14 | 6.93E-12              |
| <i>GBP6</i>             | guanylate binding protein family member 6                                            | 1.10                          | 2.61E-17 | 1.27E-14              |
| <i>AIM2</i>             | absent in melanoma 2                                                                 | 1.09                          | 5.43E-18 | 3.70E-15              |
| <i>UBD</i>              | ubiquitin D                                                                          | 1.09                          | 1.80E-10 | 1.37E-08              |
| <i>OASL</i>             | 2'-5'-oligoadenylate synthetase like                                                 | 1.09                          | 4.57E-22 | 9.07E-19              |
| <i>CD38</i>             | CD38 molecule                                                                        | 1.09                          | 2.36E-15 | 6.33E-13              |
| <i>CCL18</i>            | C-C motif chemokine ligand 18                                                        | 1.08                          | 4.73E-09 | 2.27E-07              |
| <i>IFI44L</i>           | interferon induced protein 44 like                                                   | 1.08                          | 7.40E-21 | 1.08E-17              |
| <i>IL22RA2</i>          | interleukin 22 receptor subunit alpha 2                                              | 1.08                          | 8.22E-08 | 2.51E-06              |
| <i>TIGIT</i>            | T cell immunoreceptor with Ig and ITIM domains                                       | 1.08                          | 1.22E-15 | 3.90E-13              |
| <i>MAGEA4</i>           | MAGE family member A4                                                                | 1.07                          | 3.25E-05 | 3.48E-04              |

|                  |                                                                 |       |          |          |
|------------------|-----------------------------------------------------------------|-------|----------|----------|
| <i>XIRP1</i>     | xin actin binding repeat containing 1                           | 1.07  | 1.95E-11 | 1.99E-09 |
| <i>MMP1</i>      | matrix metalloproteinase 1                                      | 1.07  | 1.09E-07 | 3.22E-06 |
| <i>CCL8</i>      | C-C motif chemokine ligand 8                                    | 1.06  | 2.46E-17 | 1.22E-14 |
| <i>CARD17</i>    | caspase recruitment domain family member 17                     | 1.06  | 1.64E-10 | 1.27E-08 |
| <i>NCCRP1</i>    | NCCRP1, F-box associated domain containing                      | 1.06  | 7.73E-07 | 1.58E-05 |
| <i>IFNL3</i>     | interferon lambda 3                                             | 1.05  | 7.88E-11 | 6.82E-09 |
| <i>RSAD2</i>     | radical S-adenosyl methionine domain containing 2               | 1.05  | 4.18E-23 | 1.14E-19 |
| <i>PLA2G2D</i>   | phospholipase A2 group IID                                      | 1.04  | 6.70E-08 | 2.10E-06 |
| <i>IFI27</i>     | interferon alpha inducible protein 27                           | 1.03  | 7.61E-16 | 2.54E-13 |
| <i>P2RY10</i>    | P2Y receptor family member 10                                   | 1.03  | 2.00E-14 | 4.20E-12 |
| <i>IGHV2-5</i>   | immunoglobulin heavy variable 2-5                               | 1.03  | 2.85E-06 | 4.79E-05 |
| <i>CTLA4</i>     | cytotoxic T-lymphocyte associated protein 4                     | 1.02  | 2.43E-14 | 4.86E-12 |
| <i>OAS2</i>      | 2'-5'-oligoadenylate synthetase 2                               | 1.02  | 1.61E-24 | 1.44E-20 |
| <i>IGF2BP3</i>   | insulin like growth factor 2 mRNA binding protein 3             | 1.01  | 3.18E-09 | 1.63E-07 |
| <i>CCL13</i>     | C-C motif chemokine ligand 13                                   | 1.01  | 1.02E-09 | 6.22E-08 |
| <i>CSAG3</i>     | CSAG family member 3                                            | 1.01  | 1.37E-06 | 2.56E-05 |
| <i>LINC01281</i> | long intergenic non-protein coding RNA 1281                     | 1.01  | 1.12E-09 | 6.76E-08 |
| <i>ZBP1</i>      | Z-DNA binding protein 1                                         | 1.01  | 2.90E-16 | 1.07E-13 |
| <i>ACTL8</i>     | actin like 8                                                    | 1.01  | 1.32E-04 | 1.08E-03 |
| <i>IL21</i>      | interleukin 21                                                  | 1.00  | 3.69E-12 | 4.60E-10 |
| <i>MUC15</i>     | mucin 15, cell surface associated                               | 1.00  | 1.31E-04 | 1.07E-03 |
| <i>TFF1</i>      | trefoil factor 1                                                | -1.42 | 4.77E-05 | 4.74E-04 |
| <i>KCNJ3</i>     | potassium inwardly rectifying channel subfamily J member 3      | -1.28 | 1.85E-04 | 1.42E-03 |
| <i>TFF3</i>      | trefoil factor 3                                                | -1.21 | 6.42E-06 | 9.23E-05 |
| <i>CST9</i>      | cystatin 9                                                      | -1.20 | 3.78E-04 | 2.51E-03 |
| <i>SERPINA11</i> | serpin family A member 11                                       | -1.18 | 1.51E-05 | 1.86E-04 |
| <i>SERPINA6</i>  | serpin family A member 6                                        | -1.18 | 5.05E-04 | 3.15E-03 |
| <i>PHF21B</i>    | PHD finger protein 21B                                          | -1.18 | 9.81E-09 | 4.19E-07 |
| <i>TPSG1</i>     | tryptase gamma 1                                                | -1.15 | 9.32E-07 | 1.85E-05 |
| <i>CYP2B7P</i>   | cytochrome P450 family 2 subfamily B member 7, pseudogene       | -1.14 | 2.36E-04 | 1.71E-03 |
| <i>MAPT-AS1</i>  | MAPT antisense RNA 1                                            | -1.12 | 6.07E-06 | 8.83E-05 |
| <i>SRARP</i>     | steroid receptor associated and regulated protein               | -1.09 | 3.91E-04 | 2.57E-03 |
| <i>AGR3</i>      | anterior gradient 3, protein disulphide isomerase family member | -1.08 | 2.77E-04 | 1.95E-03 |
| <i>MAPT-IT1</i>  | MAPT intronic transcript 1                                      | -1.08 | 5.10E-06 | 7.70E-05 |
| <i>ABCC8</i>     | ATP binding cassette subfamily C member 8                       | -1.07 | 8.30E-06 | 1.14E-04 |
| <i>WNK4</i>      | WNK lysine deficient protein kinase 4                           | -1.07 | 7.08E-08 | 2.21E-06 |
| <i>LINC01411</i> | long intergenic non-protein coding RNA 1411                     | -1.06 | 2.76E-06 | 4.67E-05 |
| <i>LINC02224</i> | long intergenic non-protein coding RNA 2224                     | -1.05 | 4.01E-04 | 2.62E-03 |
| <i>GRIA2</i>     | glutamate ionotropic receptor AMPA type subunit 2               | -1.04 | 4.05E-04 | 2.64E-03 |
| <i>PLPPR3</i>    | phospholipid phosphatase related 3                              | -1.02 | 3.87E-06 | 6.19E-05 |
| <i>NXPH1</i>     | neurexophilin 1                                                 | -1.01 | 8.73E-04 | 4.86E-03 |

<sup>a</sup>Genes are ordered by fold-change (*FC*) value (editing-high vs. -low). P values in limma's t test were adjusted with Benjamini-Hochberg method. Genes with  $\geq 2$  fold-change and adjusted P < 0.05 are listed.

<sup>b</sup>Human Genome Organization symbols and names are used.
